# Supplementary material
Source: PubMed Central journal article supplement (PMC7964982)
Supplement: 2136_table.pdf [file 2136_table.pdf]

**On-line Table: Demographic data and clinical outcomes of patients with AKI following endovascular therapy for acute ischemic stroke**

| Characteristic                                          | No AKI ( <i>n</i> = 96) | AKI ( <i>n</i> = 3) | <i>P</i> <sup>a</sup> |
|---------------------------------------------------------|-------------------------|---------------------|-----------------------|
| Age (yr)                                                | 64.6 ± 19.4             | 64.7 ± 11.0         | .425                  |
| Male sex (No.) (%)                                      | 44 (46)                 | 3 (100)             | .103                  |
| Premorbid history of (No.) (%)                          |                         |                     |                       |
| Hypertension                                            | 56 (58)                 | 2 (66)              | .181                  |
| Diabetes                                                | 16 (17)                 | 2 (66)              | .084                  |
| Prior stroke                                            | 4 (4)                   | 0                   | .181                  |
| Cardiac history                                         | 52 (54)                 | 3 (100)             | .181                  |
| Hyperlipidemia                                          | 30 (31)                 | 1 (33)              | 1                     |
| Chronic renal insufficiency                             | 2 (2)                   | 1 (33)              | .116                  |
| Peripheral vascular disease                             | 6 (6)                   | 0                   | .181                  |
| Preadmission NSAID use                                  | 29/97 (30)              | 2 (66)              | .110                  |
| Preadmission statin use                                 | 19/95 (20)              | 2 (66)              | .115                  |
| Cardioembolic source (No.) (%)                          | 59 (61)                 | 2 (66)              | .125                  |
| CT angiography or perfusion, initial 48 hours (No.) (%) | 10 (10)                 | 1 (33)              | .3                    |
| Time to intervention (h)                                | 6:32 ± 2:40             | 3:20                | NSD                   |
| Admission glucose level (mmol/L)                        | 140 ± 61                | 147 ± 17            | .544                  |
| Admission serum creatinine level (mg/dL)                | 0.9 ± 0.3               | 1.2 ± 0.1           | .023                  |
| Contrast administered (mL)                              | 185 ± 59                | 313 ± 241           | .455                  |
| Serum creatinine level at 48 hours <sup>b</sup>         | 0.9 ± 0.2               | 1.8 ± 0.5           |                       |
| Change in creatinine level (%) <sup>b</sup>             | −6.1 ± 14.9             | 45.8 ± 27.1         |                       |
| Hemorrhagic transformation                              | 47/94 (50)              | 1 (33)              | 1                     |
| Successful recanalization                               | 77/95 (81)              | 2 (66)              | .480                  |
| Discharge mRS (median IQR)                              | 4 (1–5)                 | 6 (6)               | .015                  |
| Discharge mRS ≤2 (No.) (%)                              | 33/94 (35)              | 0                   | .549                  |

<sup>a</sup> *P* value from the *t* test for continuous data; the lesser *P* values from the Fisher exact test and the Mann-Whitney *U* test for categorical data.

<sup>b</sup> Comparison in the last column was delimited by group comparison.
